# Supplementary material
Source: publisher figshare collection journal article supplement (https://acs.figshare.com/ndownloader/files/10515382)
Supplement: Supplementary file 1 [file 10515382]

## Supporting Information

### **Aircraft measurements of total mercury and monomethyl mercury in summertime marine stratus cloud water from coastal California, USA**

**AUTHORS:** WEISS-PENZIAS, Peter<sup>1\*</sup>; SOROOSHIAN, Armin<sup>2,3</sup>; COALE, Kenneth<sup>4</sup>; HEIM, Wesley<sup>4</sup>; CROSBIE, Ewan<sup>5</sup>; DADASHAZAR, Hossein<sup>2</sup>; MACDONALD, Alexander B.<sup>2</sup>; WANG, Zhen<sup>2</sup>; JONSSON, Hafliði<sup>6</sup>

*(1) Department of Microbiology and Environmental Toxicology, UC Santa Cruz, Santa Cruz, CA 95064, United States; (2) Department of Chemical and Environmental Engineering, University of Arizona, Tucson, AZ 85721, United States; (3) Department of Hydrology and Atmospheric Sciences, University of Arizona, Tucson, AZ 85721, United States; (4) Moss Landing Marine Labs, Moss Landing, CA 95039, United States; (5) NASA Langley Research Center, Hampton, VA 23666, United States; (6) Naval Postgraduate School, Monterey, CA 93943, United States*

\* Corresponding author: Peter Weiss-Penzias (University of California, Santa Cruz, 1156 High St. Santa Cruz, CA 95064, pweiss@ucsc.edu)

Supporting Information Summary: 4 Pages including cover page and 2 figures

Figure S-1: HYSPLIT back trajectory ensembles representative of the air mass histories for each flight (Stein et al., 2015<sup>1</sup>; Rolph et al., 2017<sup>2</sup>). Flights classified as continental based on [nss-Ca<sup>2+</sup>] were # 4, 10, 15-1, and 16.

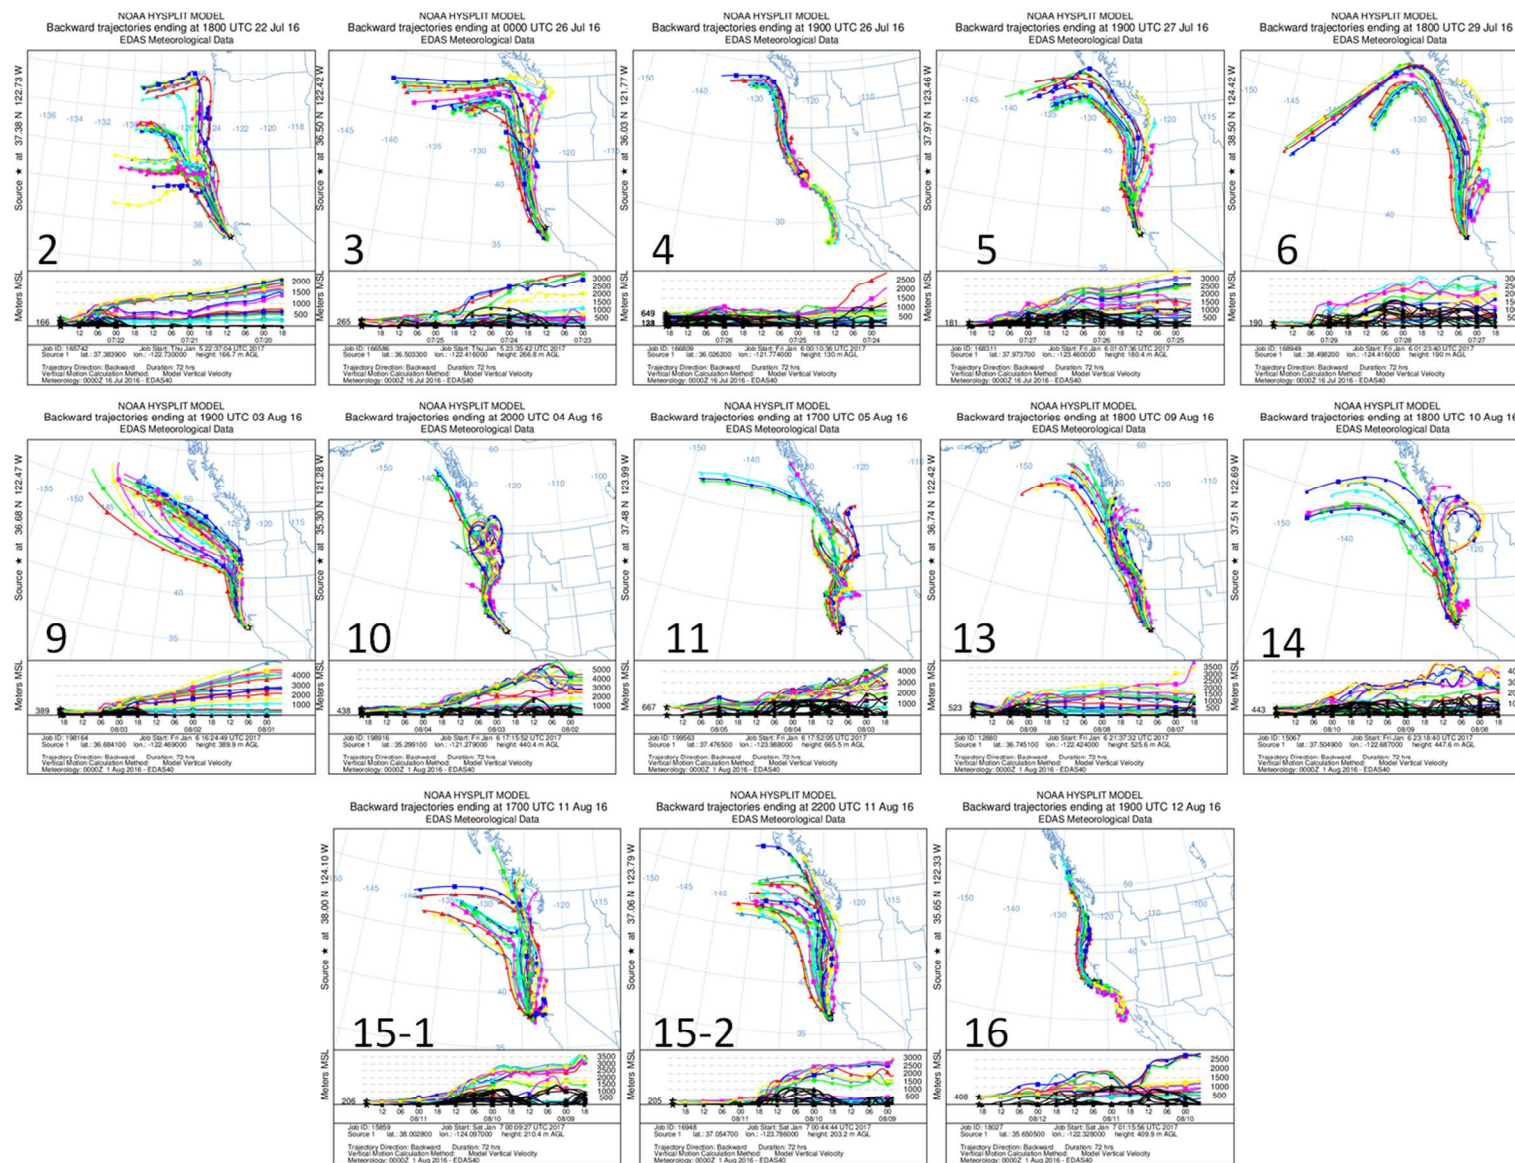

Figure S-2: Sea surface temperature from NOAA/ESRL for selected research flights (RF5, RF9, RF16).

July 27 – RF5

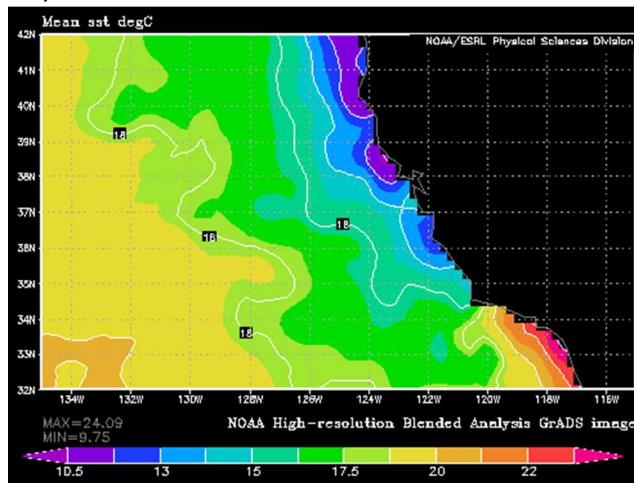

August 3 – RF9

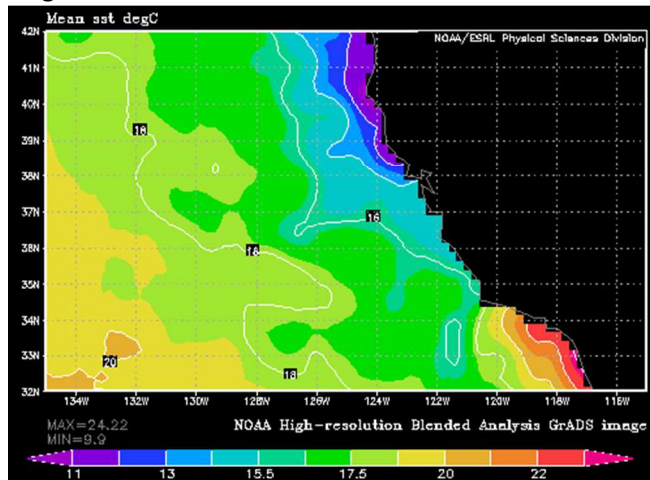

August 12 – RF16

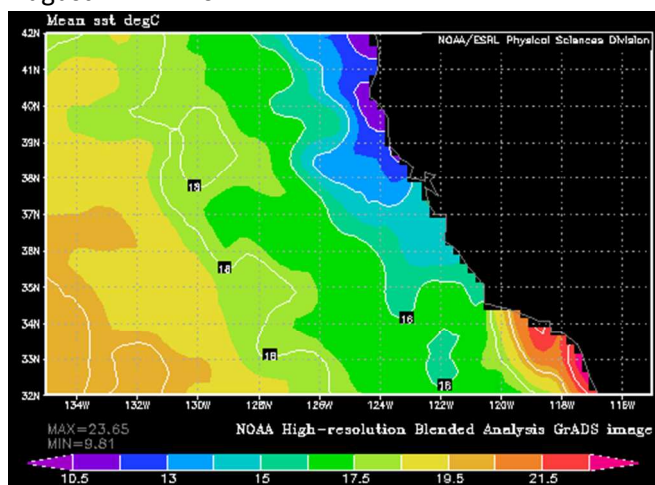

#### References:

1. Stein, A.F., Draxler, R.R, Rolph, G.D., Stunder, B.J.B., Cohen, M.D., and Ngan, F., **(2015)**. NOAA's HYSPLIT atmospheric transport and dispersion modeling system, *Bull. Amer. Meteor. Soc.*, 96, 2059-2077, <http://dx.doi.org/10.1175/BAMS-D-14-00110.1>
2. Rolph, G., Stein, A., and Stunder, B., **(2017)**. Real-time Environmental Applications and Display sYstem: READY. *Environmental Modelling & Software*, 95, 210-228, <https://doi.org/10.1016/j.envsoft.2017.06.025>
